# Supplementary material for: Benzenedicarbonyl and benzenetricarbonyl linker pyrazolyl complexes of palladium(ii): synthesis, X-ray structures and evaluation as ethylene polymerisation catalystsElectronic supplementary information (ESI) available: molecular structures and bond lengths and angles for L2, L3, L6 and 2. See http://www.rsc.org/suppdata/dt/b2/b208376k/
Source: Royal Society of Chemistry journal article supplement (doi:10.1039/b208376k), 2003-01-20
Supplement: b208376k.doc [file b208376k.doc]

# Supplementary Material

Benzenedicarbonyl and Benzenetricarbonyl Linker Pyrazolyl Complexes of Palladium (II): Synthesis, X-ray Structures and Evaluation as Ethylene Polymerisation Catalysts.

Ilia A. Guzei,a* Kelin Li,b Galina A. Bikzhanova,a James Darkwab* and Selwyn F. Mapolieb

Figure S1. Molecular drawing of **L2** shown with 30% probability ellipsoids. The hydrogen atoms are omitted for clarity. Selected bond lengths [Å] and angles [o] N(1)-N(2), 1.3840(19); N(3)-N(4), 1.386(2); N(1)-C(7), 1.409(2); N(3)-C(13) 1.402(2); O(1)-C(7), 1.207(2); O(2)-C(13), 1.208(2); C(2)-C(7), 1.492(2); C(6)-C(13), 1.501(2); N(2)-N(1)-C(7), 119.40(14); N(4)-N(3)-C(13) 122.33(14); O(1)-C(7)-C(2), 122.68(18); O(2)-C(13)-C(6), 119.96(16); O(1)-C(7)-N(1), 120.62(16); O(2)-C(13)-N(3), 118.84(17); N(1)-C(7)-C(2), 116.64(14); N(3)-C(13)-C(6), 121.20(16).

Figure S2. Molecular drawing of **L3** shown with 30% probability ellipsoids. Selected bond lengths [Å] and angles [o] N(1)-N(2), 1.3711(16); N(1)-C(5), 1.401(2); O(1)-C(5), 1.2077(17); C(2)-C(5), 1.490(2); N(2)-N(1)-C(5), 122.52(11); O(1)-C(5)-C(2), 122.70(15); O(1)-C(5)-N(1), 118.95(13); N(1)-C(7)-C(2), 118.35(12).

Figure S3. Molecular drawing of **L6** shown with 30% probability ellipsoids. Selected bond lengths [Å] and angles [o] N(1)-N(2), 1.381(3); N(3)-N(4), 1.381(3); N(5)-N(6), 1.388(3); N(1)-C(7), 1.396(3); N(3)-C(13) 1.401(3); N(5)-C(19), 1.405(3); O(1)-C(7), 1.206(3); O(2)-C(13), 1.214(3); O(3)-C(19), 1.210(3); C(1)-C(7), 1.503(3); C(3)-C(13), 1.497(3); C(5)-C(19), 1.490(3); N(2)-N(1)-C(7), 120.95(18); N(4)-N(3)-C(13) 121.53(19); N(6)-N(5)-C(19), 120.37(18); O(1)-C(7)-N(1), 120.2(2); O(1)-C(7)-C(1), 120.4(2); N(1)-C(7)-C(1), 119.3(2); O(2)-C(13)-N(3), 119.2(2); O(2)-C(13)-C(3), 120.4(2); N(3)-C(13)-C(3), 119.2(2). O(3)-C(19)-N(5), 120.0(2); O(3)-C(19)-C(5), 121.4(2); N(5)-C(19)-C(5), 118.5(2).

Figure S4. A molecular drawing of **2** shown with 30% probability ellipsoids. The H atoms are omitted for clarity. Selected bond lengths [Å] and angles [°] Pd(1)-N(1), 2.027(4); Pd(2)-N(3), 2.030(4); Pd(1)-Cl(1), 2.2712(14); Pd(2)-Cl(2), 2.2583(14); Pd(1)-Cl(4), 2.2998(11); Pd(2)-Cl(4), 2.3072(13); Pd(1)-Cl(3), 2.3532(13); Pd(2)-Cl(3), 2.3490(13); Pd(1)-Pd(2), 3.2004(65); N(1)-Pd(1)-Cl(1), 89.66(12); N(3)-Pd(2)-Cl(4), 177.94(12); N(1)-Pd(1)-Cl(4), 177.82(12); Cl(2)-Pd(2)-Cl(4), 90.60(5); Cl(1)-Pd(1)-Cl(4), 90.01(5); N(3)-Pd(2)-Cl(3), 94.68(12); N(1)-Pd(1)-Cl(3), 93.95(12); Cl(2)-Pd(2)-Cl(3), 174.95(5); Cl(1)-Pd(1)-Cl(3), 176.08(5); Cl(4)-Pd(2)-Cl(3), 84.35(5); Cl(4)-Pd(1)-Cl(3), 84.42(4)
